# Supplementary material
Source: PubMed Central journal article supplement (PMC5068537)

1 **FIGURE LEGEND**

2 Supplementary Figure 1. IHC of subretinally injected rAAV2i8 and rAAV2  
3 capsids. Both capsids showed the majority of transduction in the ONL and RPE,  
4 with fewer transduced cells of the INL and RGC. Staining for rhodopsin indicated  
5 that transduction occurred in rods for both rAAV2 and rAAV2i8 capsids (a).  
6 Transduction of rod bipolar cells is shown by PKC-alpha co-localization  
7 (arrowhead, b). Co-staining with glutamine synthetase indicate Muller glia are  
8 transduced by rAAV2i8 (arrowhead, c). Scale bar = 50  $\mu$ m. RGC, retinal ganglion  
9 cell layer; INL, inner nuclear layer; ONL, outer nuclear layer.

10

11 Supplementary Figure 2. Intravitreal delivery of high-titer rAAV2 capsids resulted  
12 in transduction only in the presence of HS binding. Fundus images of eyes  
13 injected with  $2 \times 10^9$  vg rAAV2 or rAAV2-R585E vector were collected at 8 weeks  
14 following delivery. Transduction with rAAV2-R58E is absent, but rAAV2 shows a  
15 diffuse pattern that does not accumulate in any particular pattern.

16

17 Supplementary Figure 3. Subretinal transduction of rAAV2 capsid variants mixed  
18 with vitreous to confirm vitreous did not inhibit transduction. Vector solution was  
19 preincubated with equal volume of vitreous collected from mouse eyes for 1 hour  
20 before being injected. Transduction of RPE was seen with both rAAV2 and  
21 rAAV2-R585E, although the transduction of RGC is evident for rAAV2  
22 (arrowhead).

23

24

25 Supplementary Figure 4. Staining of HS in the retinas of multiple animal models.  
26 Retinas of mouse, rabbit, non-human primate, and human are shown. Each  
27 animal retina has been stained with secondary antibody only (without antibody)  
28 and with an antibody specific to HSPG (with antibody). Intense staining is seen at  
29 the ILM in all animal species and is not present in the negative control. Scale bar  
30 = 50  $\mu\text{m}$ . RGC, retinal ganglion cell layer; INL, inner nuclear layer; ONL, outer  
31 nuclear layer

32

33 Supplementary Figure 5. Analyses of HS-binding variants of rAAV6 eight weeks  
34 after intravitreal delivery. Images show typical fundus and fluorescence of eyes  
35 treated with rAAV6 capsid or rAAV6-K531E capsid at a low titer of  $5 \times 10^7$  vg.  
36 Punctate expression around the retinal vessels could only be seen in eyes  
37 injected with rAAV6. Quantification of fundus images did not indicate  
38 significance.

39

40 Supplementary Figure 6. *In vitro* competition assay using soluble heparin to  
41 block the transduction of rAAV of HEK293 cells. Viruses were incubated with  
42 increasing doses of soluble heparin and applied to cell culture at a multiplicity of  
43 infection of 10,000 vg per cell. rAAV2 displayed a dose-dependent decrease in  
44 transduction which was not observed with either rAAV1 or rAAV1-E531K. The  
45 amount of transduction of rAAV1-E531K was lower than rAAV1 in all conditions.  
46 Error bars shown as SEM.

47

48 Supplementary Figure 7. Analyses of HS-binding variants of rAAV8 eight weeks  
49 after intravitreal delivery. Images show typical fundus and fluorescence of eyes  
50 treated with rAAV8 capsid or rAAV8-E533K capsid at a titer of  $1 \times 10^8$  vg. Hazy  
51 expression could only be detected with HS-binding rAAV8-E533K capsid.  
52 Quantification of fundus images show error bars as the SEM and trend toward  
53 significance ( $p < 0.055$ ).

54

55 Supplementary Figure 8. FISH detection of retinas injected with AAV serotypes  
56 and their HS-binding mutants three days after injection. The detection reaction  
57 was carried out twice and image levels were adjusted equally to enhance weak  
58 labeling. Transgenes found in the retina were more abundant with eyes injected  
59 with the HS-binding motif compared to their natural serotypes. rAAV8-E533K  
60 capsid could be seen accumulating at the ILM in addition to its presence in the  
61 retina. PBS-injected retinas had minimal background signal. Scale bar = 20  $\mu\text{m}$ .  
62 RGC, retinal ganglion cell layer; INL, inner nuclear layer; ONL, outer nuclear  
63 layer.

64

65 Supplementary Figure 9. The transduction of rAAV2.5 is due to the residue  
66 mutation at position 265. The single amino acid mutant of rAAV2-265D was  
67 tested for intravitreal delivery at 8 weeks post-injection. The transduction by this  
68 single point mutant was similar to that of rAAV2.5, where transduction along  
69 retinal vessels is prominent.

70

71 Supplementary Figure 10. Galactose binding alone on rAAV capsid does not  
72 transduce the retina following IVit delivery. Fundus images of rAAV9 showed  
73 hazy expression around the retina, while HS-deficient rAAV2i8G9 no longer  
74 transduced the retina (a). The staining for galactose was carried out with  
75 fluorescein-labeled lectin and showed the strongest expression in the ONL (b).  
76 Scale bar = 20  $\mu$ m. RGC, retinal ganglion cell layer; INL, inner nuclear layer;  
77 ONL, outer nuclear layer.

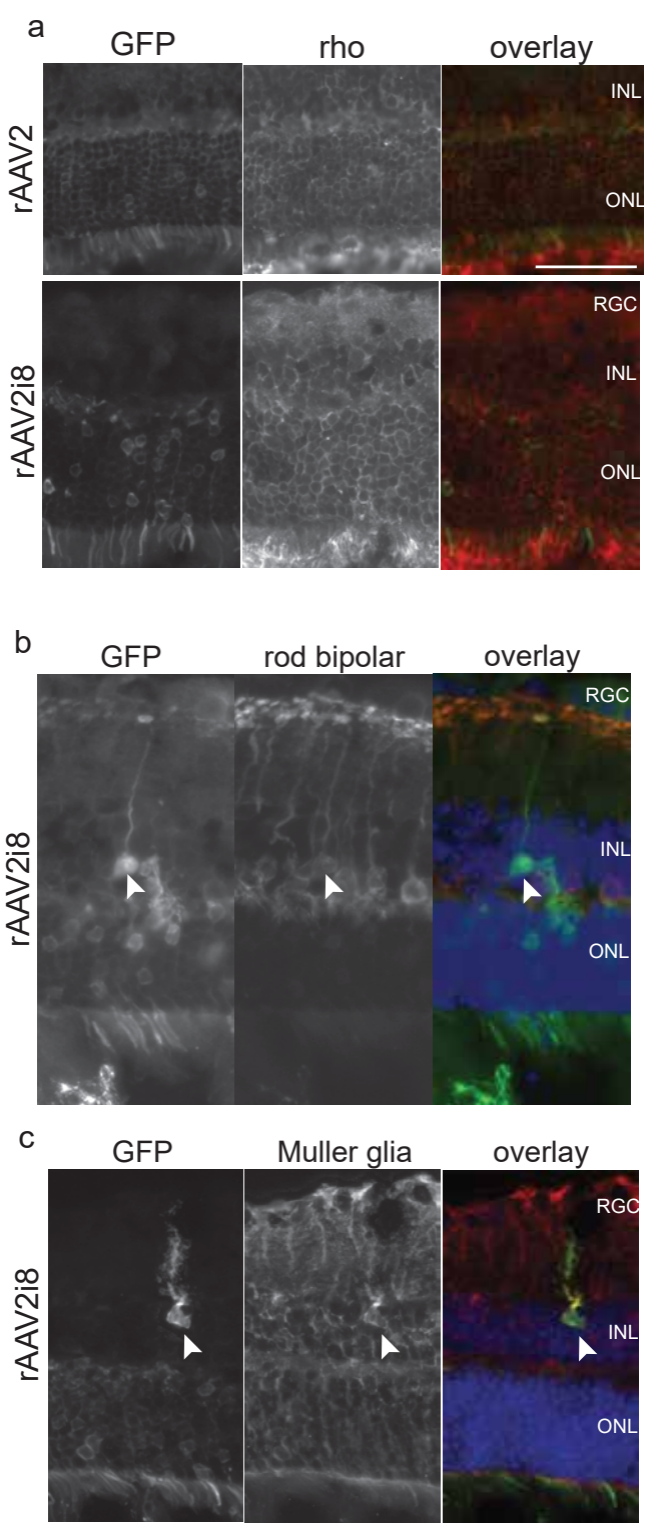

Supp. Fig. 1

AAV2

AAV2-R585E

2E9 vg

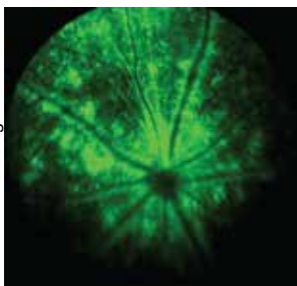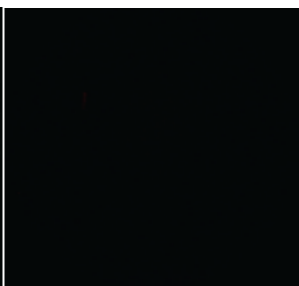

AAV2

AAV2-R585E

AAV mixed with vitreous

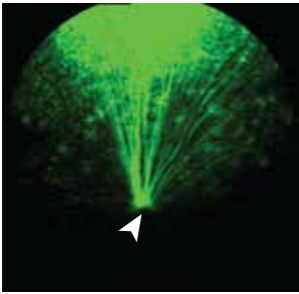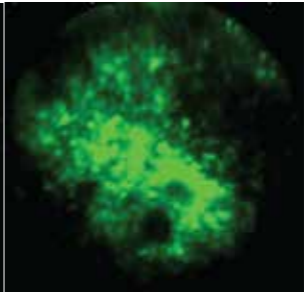

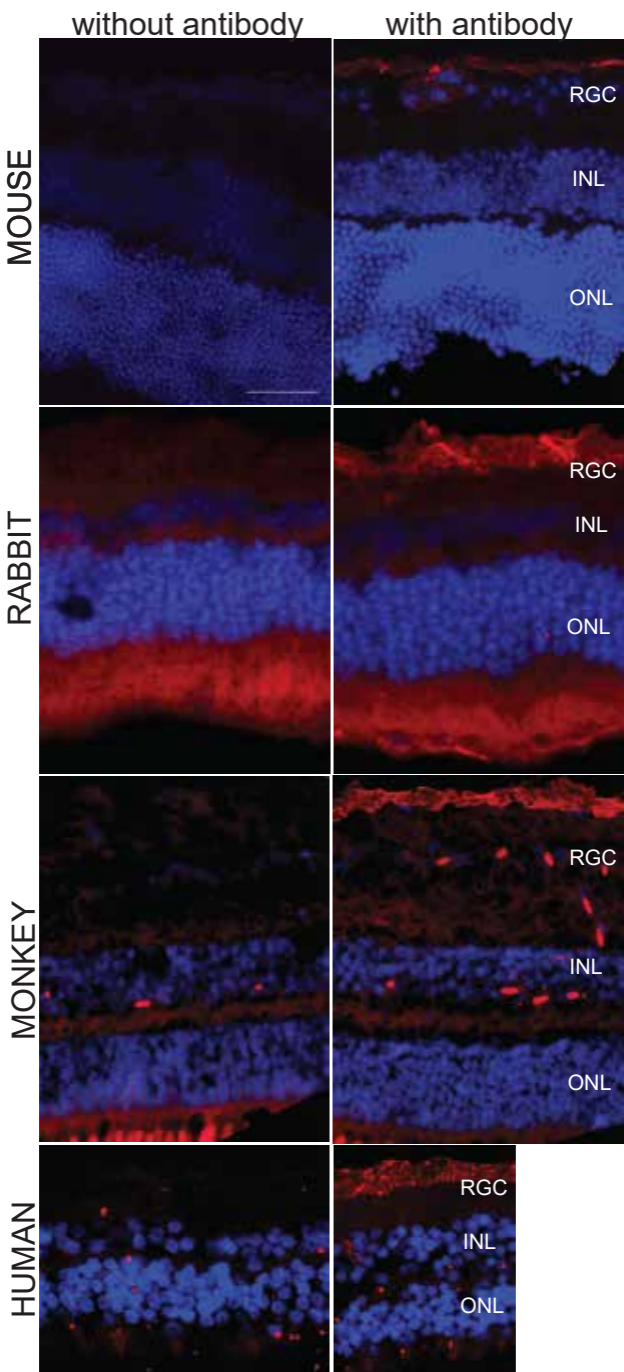

Supp. Fig. 4



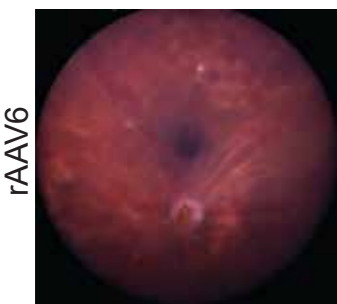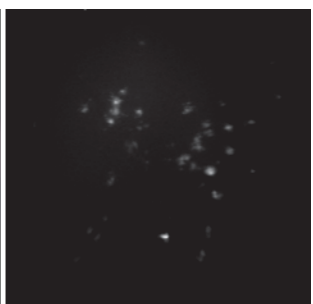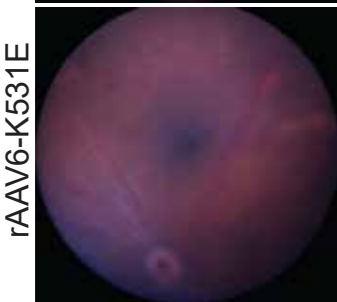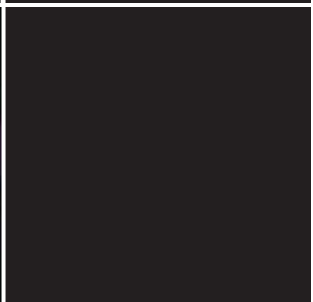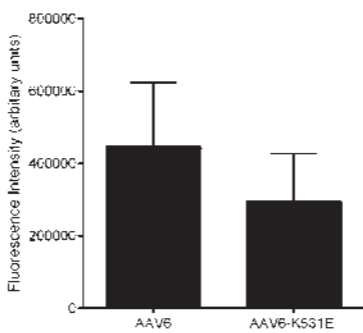

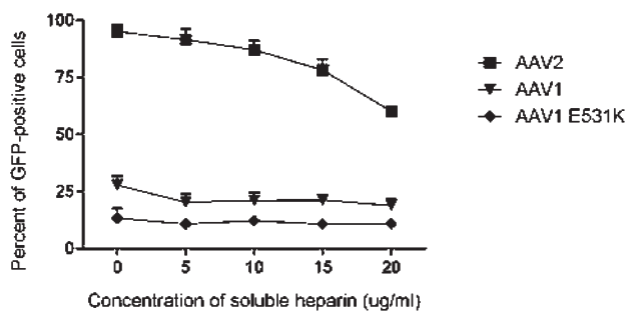

rAAV8

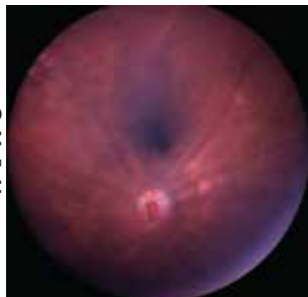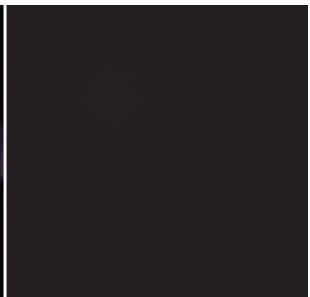

rAAV8-E533K

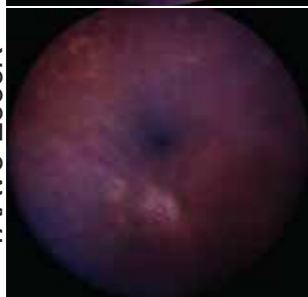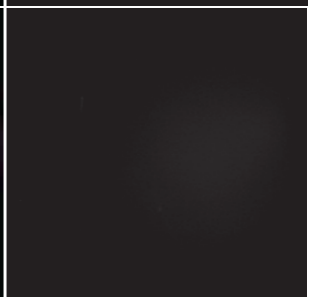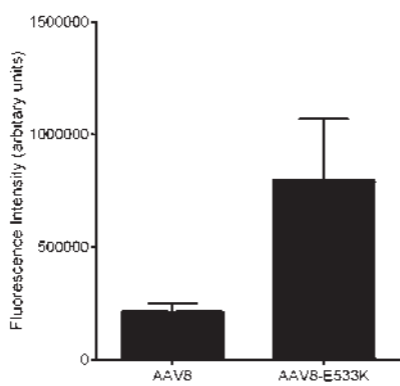

Supp. Fig. 7

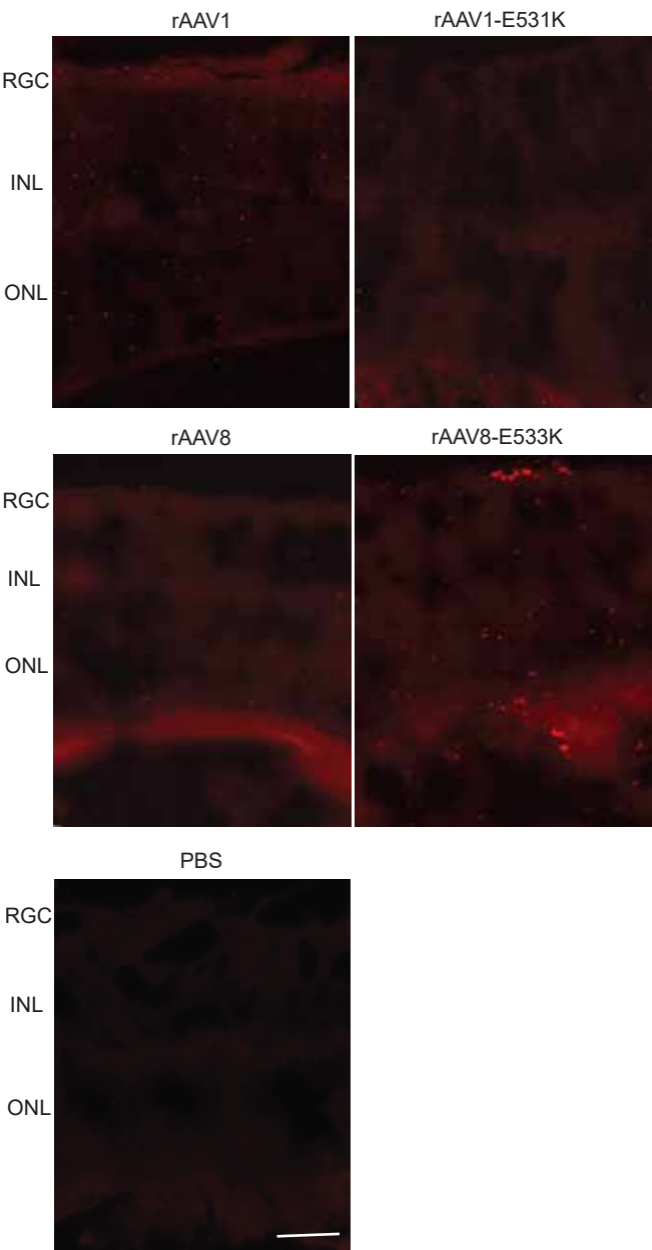

Supp. Fig. 8

rAAV2-265D

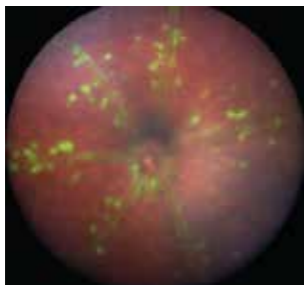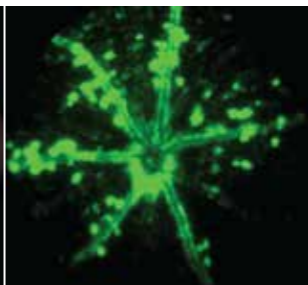

a

rAAV9

rAAV2i8G9

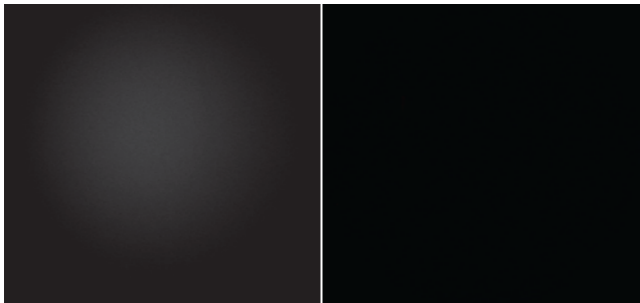

b

No antibody

Galactose

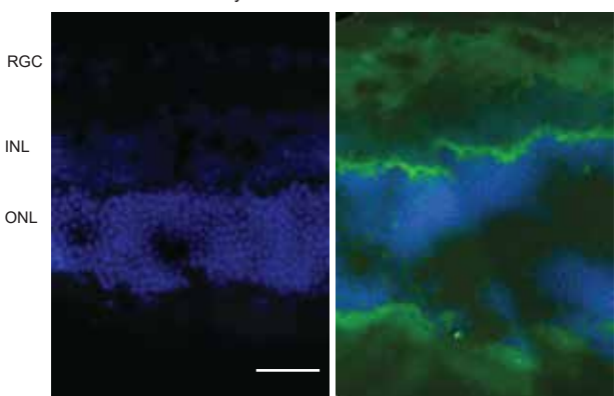

Supplement: JVI.01568-16_zjv999182064so1.pdf [file JVI.01568-16_zjv999182064so1.pdf]
